# Supplementary material
Source: Springer Nature journal article supplement (https://www.springermedizin.de/resource/supplementary/12908_2011_114_MOESM3_ESM.pdf/9525142)
Supplement: MOESM3 [file 9525142]

Patients' demand for AMs contributes to overuse in community

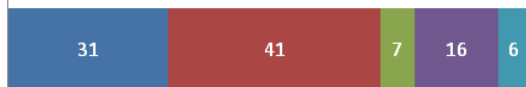

Patients' demand for AMs contribute with overuse in hospitals

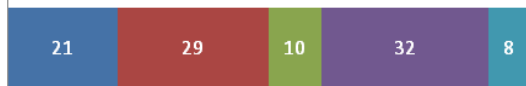

I suspect that AMs available in my hospital have poor quality and do not work

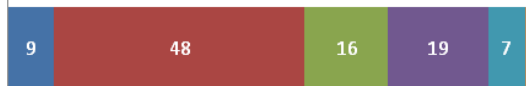

I never know which AMs are available in my hospital since the formulary always change

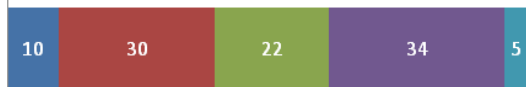

My choice of AM is more influenced by the availability of the AM than by the cause of disease

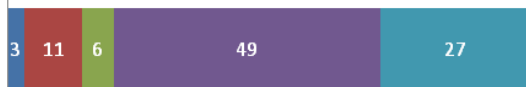

0% 20% 40% 60% 80% 100%

■ Strongly agree ■ Agree ■ Neutral ■ Disagree ■ Strongly disagree ■ No response
